# Supplementary material
Source: PubMed Central journal article supplement (PMC3392620)
Supplement: Supp_Data.pdf [file Supp_Data.pdf]

## Supplementary Data

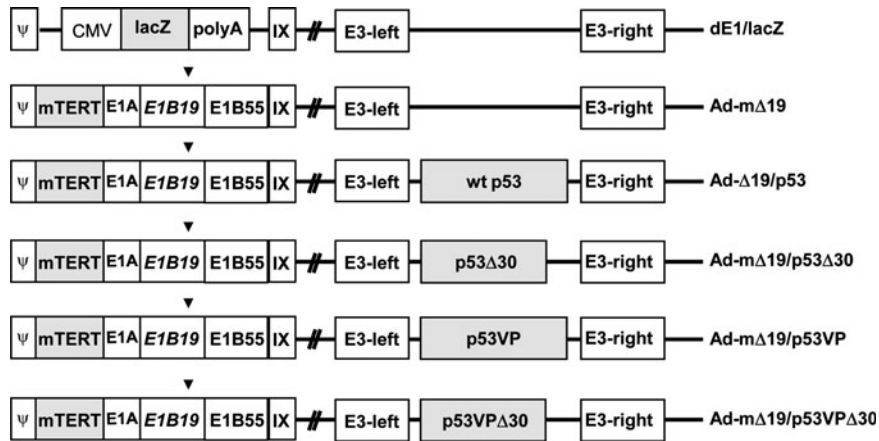

**SUPPLEMENTARY FIG. S1.** Schematic representations of the adenoviral (Ad) vectors used in this study. The replication-incompetent dE1/lacZ lacks the entire E1 region and expresses the reporter gene *lacZ* ( $\beta$ -galactosidase protein) under the control of the constitutive cytomegalovirus (CMV) promoter. The replication-competent oncolytic Ad-m $\Delta$ 19 contains a normal E1A region and E1B 55kD gene, but the E1B-19kD translation initiation codon is mutated, and E1A expression is controlled by a modified human telomerase promoter (mTERT). Ad-m $\Delta$ 19/p53, Ad-m $\Delta$ 19/p53 $\Delta$ 30, Ad-m $\Delta$ 19/p53VP, and Ad-m $\Delta$ 19/p53VP $\Delta$ 30 contain the wild-type p53, p53 $\Delta$ 30, p53VP, and p53VP $\Delta$ 30 genes, respectively, in the E3 region of Ad-m $\Delta$ 19.  $\psi$ , packaging signal; IX, protein IX; solid inverted triangles, mutated translation initiation codon of E1B-19kD.

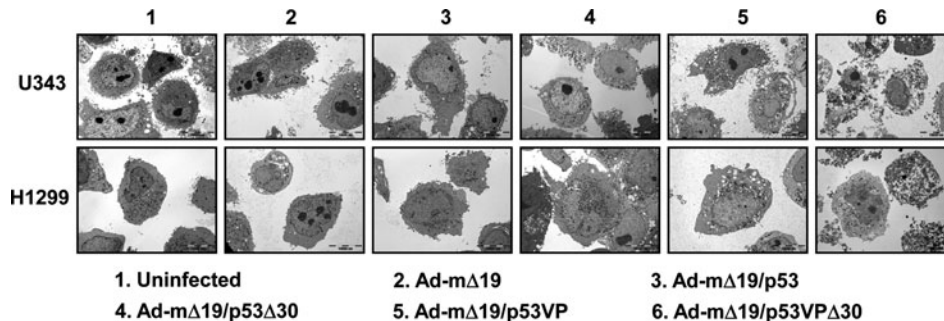

**SUPPLEMENTARY FIG. S2.** Detection of apoptosis by transmission electron microscopy. Cells were infected with each vector (MOI, 1). Thirty-six hours postinfection, the cells were harvested and analyzed by transmission electron microscopy. U343 and H1299 cells infected with Ad-m $\Delta$ 19/p53VP $\Delta$ 30 exhibit markedly increased morphologic changes, and live cells were not observed (original magnification,  $\times$ 3000).

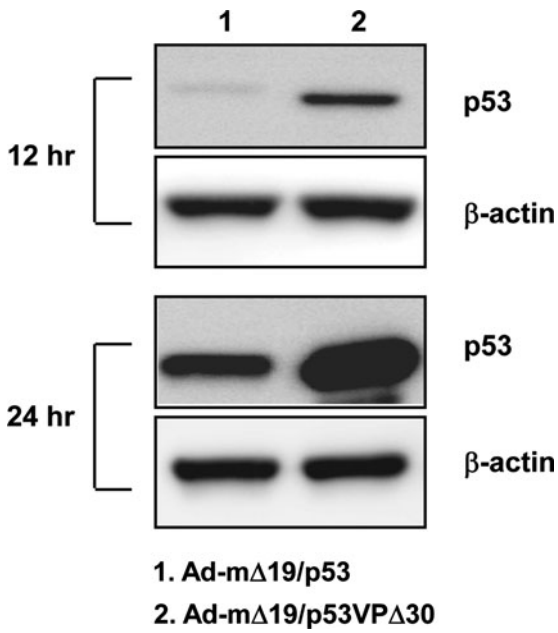

**SUPPLEMENTARY FIG. S3.** Detection of p53VP $\Delta$ 30 proteins. H1299 cells were infected with Ad-m $\Delta$ 19/p53 or Ad-m $\Delta$ 19/p53VP $\Delta$ 30 (MOI, 1). Twelve and twenty-four hours after infection, each cell lysate was analyzed by Western blot with antibody against p53;  $\beta$ -actin was used as an internal control.

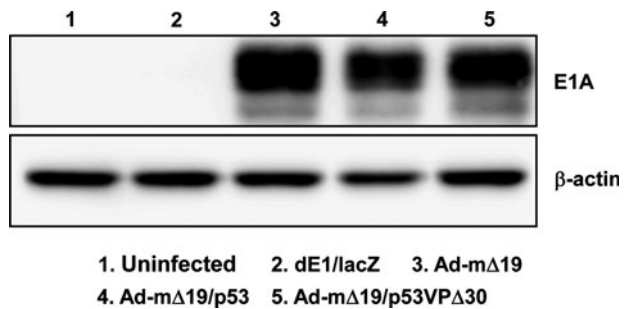

**SUPPLEMENTARY FIG. S4.** Detection of E1A proteins. H1299 cells were infected with each vector (MOI, 1). Twenty-four hours postinfection, each cell lysate was analyzed by Western blot with antibody against E1A;  $\beta$ -actin was used as an internal control.
